# Supplementary material
Source: ML conference proceedings conference paper supplement (https://proceedings.mlr.press/v97/zhang19s.html)
Supplement: Supplementary file 1 [file zhang19s-supp.pdf]

---

# Supplementary Materials:

## Interpreting Adversarially Trained Convolutional Neural Networks

---

Tianyuan Zhang<sup>1</sup> Zhanxing Zhu<sup>2,3,4</sup>

### 1. Experiment Setup

#### 1.1. Models

- **CIFAR-10.** We train a standard ResNet-18 (He et al., 2016) architecture, it has 4 groups of residual layers with filter sizes (64, 128, 256, 512) and 2 residual units.
- **Caltech-256 & Tiny ImageNet.** We use a ResNet-18 architecture using the code from pytorch (Paszke et al., 2017). Note that for models on Caltech-256 & Tiny ImageNet, we initialize them using ImageNet (Deng et al., 2009) pre-trained weights provided by pytorch.

We evaluate the robustness of all our models using a  $l_\infty$  projected gradient descent adversary with  $\epsilon = 8/255$ , step size = 2 and number of iterations as 40.

#### 1.2. Adversarial Training

We perform 9 types of adversarial training on each of the dataset. 7 of the 9 kinds of adversarial training are against a projected gradient descent (PGD) adversary (Madry et al., 2018), the other 2 are against FGSM adversary (Goodfellow et al., 2014).

##### 1.2.1. TRAIN AGAINST A PROJECTED GRADIENT DESCENT (PGD) ADVERSARY

We list value of  $\epsilon$  for adversarial training of each dataset and  $l_p$ -norm. In all settings, PGD runs 20 iterations.

- **$l_\infty$ -norm bounded adversary.** For all of the three data set, pixel values range from 0 to 1, we train 4 adversarially trained CNNs with  $\epsilon \in \{1/255, 2/255, 4/255, 8/255\}$ , these four models are denoted as PGD-inf: 1, 2, 4, 8 respectively, and steps size as 1/255, 2/255, 4/255, 8/255.

---

<sup>1</sup>School of EECS, Peking University, China <sup>2</sup>School of Mathematical Sciences, Peking University, China <sup>3</sup>Center for Data Science, Peking University <sup>4</sup>Beijing Institute of Big Data Research. Correspondence to: Zhanxing Zhu <zhanxing.zhu@pku.edu.cn>.

- **$l_2$ -norm bounded adversary.** For Caltech-256 & Tiny ImageNet, the input size for our model is  $224 \times 224$ , we train three adversarially trained CNNs with  $\epsilon \in \{4, 8, 12\}$ , and these four models are denoted as PGD-l2: 4, 8, 12 respectively. Step sizes for these three models are 2/255, 4/255, 6/255. For CIFAR-10, where images are of size  $32 \times 32$ , the three adversarially trained CNNs have  $\epsilon \in \{4/10, 8/10, 12/10\}$ , but they are denoted in the same way and have the same step size as that in Caltech-256 & Tiny ImageNet.

##### 1.2.2. TRAIN AGAINST A FGSM ADVERSARY

$\epsilon$  for these two adversarially trained CNNs are  $\epsilon \in \{4, 8\}$ , and they are denoted as FGSM 4, 8 respectively.

### 2. Style-transferred test set

Following (Geirhos et al., 2019) we construct stylized test set for Caltech-256 and Tiny ImageNet by applying the AdaIn style transfer (Huang & Belongie, 2017) with a stylization coefficient of  $\alpha = 1.0$  to every test image with the style of a randomly selected painting from <sup>1</sup>Kaggle's *Painter by numbers* dataset. we used source code provided by (Geirhos et al., 2019).

### 3. Experiments on Fourier-filtered datasets

(Jo & Bengio, 2017) showed deep neural networks tend to learn surface statistical regularities as opposed to high-level abstractions. Following them, we test the performance of different trained CNNs on the high-pass and low-pass filtered dataset to show their tendencies.

#### 3.1. Fourier filtering setup

Following (Jo & Bengio, 2017) We construct three types of Fourier filtered version of test set.

- **The low frequency filtered version.** We use a radial mask in the Fourier domain to set higher frequency modes to zero. (low-pass filtering)

---

<sup>1</sup><https://www.kaggle.com/c/painter-by-numbers/>

- **The high frequency filtered version.** We use a radial mask in the Fourier domain to preserve only the higher frequency modes.(high-pass filtering)
- **The random filtered version.** We use a random mask in the Fourier domain to set each mode to 0 with probability  $p$  uniformly. The random mask is generated on the fly during the test.

### 3.2. Results

We measure generalization performance (accuracy on correctly classified images) of each model on these three filtered datasets from Caltech-256, results are listed in Table 1. AT-CNNs performs better on Low-pass filtered dataset and worse on High-pass filtered dataset. Results indicate that AT-CNNs make their predictions depend more on low-frequency information. This finding is consistent with our conclusions since local features such as textures are often considered as high-frequency information, and shapes and contours are more like low-frequency.

## 4. Detailed results

We the detailed results for our quantitative experiments here. Table 3, 2, 4 show the results of each models on test set with different saturation levels. Table 6, 5 list all the results of each models on test set after different path-shuffling operations.

## 5. Additional Figures

We show additional sensitive maps in Figure 1. We also compare the sensitive maps using **Grad** and **SmoothGrad** in Figure 2.

## References

- Deng, J., Dong, W., Socher, R., Li, L.-J., Li, K., and Fei-Fei, L. Imagenet: A large-scale hierarchical image database. In *Computer Vision and Pattern Recognition, 2009. CVPR 2009. IEEE Conference on*, pp. 248–255. Ieee, 2009.
- Geirhos, R., Rubisch, P., Michaelis, C., Bethge, M., Wichmann, F. A., and Brendel, W. Imagenet-trained cnns are biased towards texture; increasing shape bias improves accuracy and robustness. In *International Conference on Learning Representations*, 2019.
- Goodfellow, I. J., Shlens, J., and Szegedy, C. Explaining and harnessing adversarial examples. *arXiv preprint arXiv:1412.6572*, 2014.
- He, K., Zhang, X., Ren, S., and Sun, J. Deep residual learning for image recognition. In *Proceedings of the IEEE conference on computer vision and pattern recognition*, pp. 770–778, 2016.
- Huang, X. and Belongie, S. Arbitrary style transfer in real-time with adaptive instance normalization. In *2017 IEEE International Conference on Computer Vision (ICCV)*, pp. 1510–1519. IEEE, 2017.
- Jo, J. and Bengio, Y. Measuring the tendency of cnns to learn surface statistical regularities. *arXiv preprint arXiv:1711.11561*, 2017.
- Madry, A., Makelov, A., Schmidt, L., Tsipras, D., and Vladu, A. Towards deep learning models resistant to adversarial attacks. In *International Conference on Learning Representations*, 2018.
- Paszke, A., Gross, S., Chintala, S., Chanan, G., Yang, E., DeVito, Z., Lin, Z., Desmaison, A., Antiga, L., and Lerer, A. Automatic differentiation in pytorch. 2017.
- Smilkov, D., Thorat, N., Kim, B., Viégas, F., and Wattenberg, M. Smoothgrad: removing noise by adding noise. *arXiv preprint arXiv:1706.03825*, 2017.

Supplementary Materials: Interpreting Adversarially Trained Convolutional Neural Networks

Table 1. “Accuracy on correctly classified images” for different models on three Fourier-filtered Caltech-256 test sets.

| DATA SET          | THE LOW FREQUENCY FILTERED VERSION | THE HIGH FREQUENCY FILTERED VERSION | THE RANDOM FILTERED VERSION |
|-------------------|------------------------------------|-------------------------------------|-----------------------------|
| STANDARD          | 15.8                               | 16.5                                | 73.5                        |
| UNDERFIT          | 14.5                               | 17.6                                | 62.2                        |
| PGD- $l_\infty$ : | 71.1                               | 3.6                                 | 73.4                        |

Table 2. “Accuracy on correctly classified images” for different models on saturated Caltech-256 test set. It is easily observed AT-CNNs are much more robust to increasing saturation levels on Caltech-256.

| SATURAION LEVEL     | 0.25         | 0.5          | 1            | 4            | 8            | 16           | 64           | 1024         |
|---------------------|--------------|--------------|--------------|--------------|--------------|--------------|--------------|--------------|
| STANDARD            | 28.62        | 57.45        | 85.20        | 90.13        | 65.37        | 42.37        | 23.45        | 20.03        |
| UNDERFIT            | 31.84        | <b>63.36</b> | <b>90.96</b> | 84.51        | 57.51        | 38.58        | 26.00        | 23.08        |
| PGD- $l_\infty$ : 8 | 32.84        | 53.47        | 82.72        | 86.45        | <b>70.33</b> | <b>61.09</b> | <b>53.76</b> | <b>51.91</b> |
| PGD- $l_\infty$ : 4 | 31.99        | 57.74        | 85.18        | 87.95        | <b>70.33</b> | 58.38        | 48.16        | 45.45        |
| PGD- $l_\infty$ : 2 | <b>32.99</b> | 60.75        | 87.75        | 89.35        | 68.78        | 51.99        | 40.69        | 37.83        |
| PGD- $l_\infty$ : 1 | 32.67        | 61.85        | 89.36        | <b>90.18</b> | 69.07        | 50.05        | 37.98        | 34.80        |
| PGD- $l_2$ : 12     | 31.38        | 53.07        | 82.10        | 83.89        | 67.06        | 58.51        | 52.45        | 50.75        |
| PGD- $l_2$ : 8      | 32.82        | 56.65        | 85.01        | 86.09        | 68.90        | 58.75        | 51.59        | 49.30        |
| PGD- $l_2$ : 4      | 32.82        | 58.77        | 86.30        | 86.36        | 67.94        | 53.68        | 44.43        | 41.98        |
| FGSM: 8             | 29.53        | 55.46        | 85.10        | 86.65        | 69.01        | 55.64        | 45.92        | 43.42        |
| FGSM: 4             | 32.68        | 59.37        | 87.22        | 87.90        | 66.71        | 51.13        | 41.66        | 38.78        |

Table 3. “Accuracy on correctly classified images” for different models on saturated Tiny ImageNet test set. It is easily observed AT-CNNs are much more robust to increasing saturation levels on Tiny ImageNet.

| SATURAION LEVEL     | 0.25         | 0.5          | 1            | 4            | 8            | 16           | 64           | 1024         |
|---------------------|--------------|--------------|--------------|--------------|--------------|--------------|--------------|--------------|
| STANDARD            | 7.24         | 25.88        | 72.52        | 72.73        | 25.38        | 8.24         | 2.62         | 1.93         |
| UNDERFIT            | 7.34         | 25.44        | 69.80        | 60.67        | 18.01        | 6.72         | 3.16         | 2.65         |
| PGD- $l_\infty$ : 8 | 11.07        | 29.08        | 67.11        | 74.53        | 49.8         | 40.16        | 35.44        | 33.96        |
| PGD- $l_\infty$ : 4 | 12.44        | 33.53        | 72.94        | 75.75        | 46.38        | 32.12        | 24.92        | 22.65        |
| PGD- $l_\infty$ : 2 | 12.09        | 34.85        | 75.77        | 76.15        | 41.35        | 25.20        | 16.93        | 14.52        |
| PGD- $l_\infty$ : 1 | 11.30        | <b>35.03</b> | 76.85        | 78.63        | 40.48        | 21.37        | 12.70        | 10.81        |
| PGD- $l_2$ : 12     | 11.30        | 29.48        | 66.94        | 75.22        | <b>52.26</b> | <b>42.11</b> | <b>37.20</b> | <b>35.85</b> |
| PGD- $l_2$ : 8      | 12.42        | 32.78        | 71.94        | 75.15        | 47.92        | 35.66        | 29.55        | 27.90        |
| PGD- $l_2$ : 4      | <b>12.63</b> | 34.10        | 74.06        | 77.32        | 45.00        | 28.73        | 20.16        | 18.04        |
| FGSM: 8             | 12.59        | 32.66        | 70.55        | <b>81.53</b> | 41.83        | 17.52        | 7.29         | 5.82         |
| FGSM: 4             | <b>12.63</b> | 34.10        | <b>74.06</b> | 75.05        | 42.91        | 29.09        | 22.15        | 20.14        |

Table 4. “Accuracy on correctly classified images” for different models on saturated CIFAR-10 test set. It is easily observed AT-CNNs are much more robust to increasing saturation levels on CIFAR-10.

| SATURAION LEVEL     | 0.25         | 0.5          | 1            | 4            | 8            | 16           | 64           | 1024         |
|---------------------|--------------|--------------|--------------|--------------|--------------|--------------|--------------|--------------|
| STANDARD            | 27.36        | 55.95        | <b>91.03</b> | <b>93.12</b> | 69.98        | 48.30        | 34.39        | 31.06        |
| UNDERFIT            | 21.43        | 50.28        | 87.71        | 89.89        | 66.09        | 43.35        | 29.10        | 26.13        |
| PGD- $l_\infty$ : 8 | 26.05        | 46.96        | 80.97        | 89.16        | <b>75.46</b> | <b>69.08</b> | 58.98        | <b>64.64</b> |
| PGD- $l_\infty$ : 4 | 27.22        | 49.81        | 84.16        | 89.79        | 73.89        | 65.35        | 59.99        | 58.47        |
| PGD- $l_\infty$ : 2 | <b>28.32</b> | 53.12        | 86.93        | 91.37        | 74.02        | 62.82        | 55.25        | 52.60        |
| PGD- $l_\infty$ : 1 | 27.18        | 53.59        | 88.54        | 91.77        | 72.67        | 58.39        | 47.25        | 41.75        |
| PGD- $l_2$ : 12     | 25.99        | 46.92        | 81.72        | 88.44        | 73.92        | 66.03        | 60.98        | 59.41        |
| PGD- $l_2$ : 8      | 27.75        | 50.29        | 83.76        | 80.92        | 73.17        | 64.83        | 58.64        | 46.94        |
| PGD- $l_2$ : 4      | 27.26        | 51.17        | 85.78        | 90.08        | 73.12        | 61.50        | 52.04        | 48.79        |
| FGSM: 8             | 25.50        | 46.11        | 81.72        | 87.67        | 74.22        | 67.12        | <b>62.51</b> | 61.32        |
| FGSM: 4             | 26.39        | <b>58.93</b> | 84.30        | 89.02        | 73.47        | 64.43        | 58.80        | 56.82        |

Table 5. “Accuracy on correctly classified images” for different models on Patch-shuffled Caltech-256 test set. Results indicates that AT-CNNs are more sensitive to Patch-shuffle operations on Caltech-256.

| DATA SET            | $2 \times 2$ | $4 \times 4$ | $8 \times 8$ |
|---------------------|--------------|--------------|--------------|
| STANDARD            | <b>84.76</b> | <b>51.50</b> | <b>10.84</b> |
| UNDERFIT            | 75.59        | 33.41        | 6.03         |
| PGD- $l_\infty$ : 8 | 58.13        | 20.14        | 7.70         |
| PGD- $l_\infty$ : 4 | 68.54        | 26.45        | 8.18         |
| PGD- $l_\infty$ : 2 | 74.25        | 30.77        | 9.00         |
| PGD- $l_\infty$ : 1 | 78.11        | 35.03        | 8.42         |
| PGD- $l_2$ : 12     | 58.25        | 21.03        | 7.85         |
| PGD- $l_2$ : 8      | 63.36        | 22.19        | 8.48         |
| PGD- $l_2$ : 4      | 69.65        | 28.21        | 7.72         |
| FGSM: 8             | 64.48        | 22.94        | 8.07         |
| FGSM: 4             | 70.50        | 28.41        | 6.03         |

Table 6. “Accuracy on correctly classified images” for different models on Patch-shuffled Tiny ImageNet test set. Results indicates that AT-CNNs are more sensitive to Patch-shuffle operations on Tiny ImageNet.

| DATA SET            | $2 \times 2$ | $4 \times 4$ | $8 \times 8$ |
|---------------------|--------------|--------------|--------------|
| STANDARD            | <b>66.73</b> | <b>24.87</b> | 4.48         |
| UNDERFIT            | 59.22        | 23.62        | 4.38         |
| PGD- $l_\infty$ : 8 | 41.08        | 16.05        | 6.83         |
| PGD- $l_\infty$ : 4 | 49.54        | 18.23        | 6.30         |
| PGD- $l_\infty$ : 2 | 55.96        | 19.95        | 5.61         |
| PGD- $l_\infty$ : 1 | 60.19        | 23.24        | 6.08         |
| PGD- $l_2$ : 12     | 42.23        | 16.95        | <b>7.66</b>  |
| PGD- $l_2$ : 8      | 47.67        | 16.28        | 6.50         |
| PGD- $l_2$ : 4      | 51.94        | 17.79        | 5.89         |
| FGSM: 8             | 57.42        | 20.70        | 4.73         |
| FGSM: 4             | 50.68        | 16.84        | 5.98         |

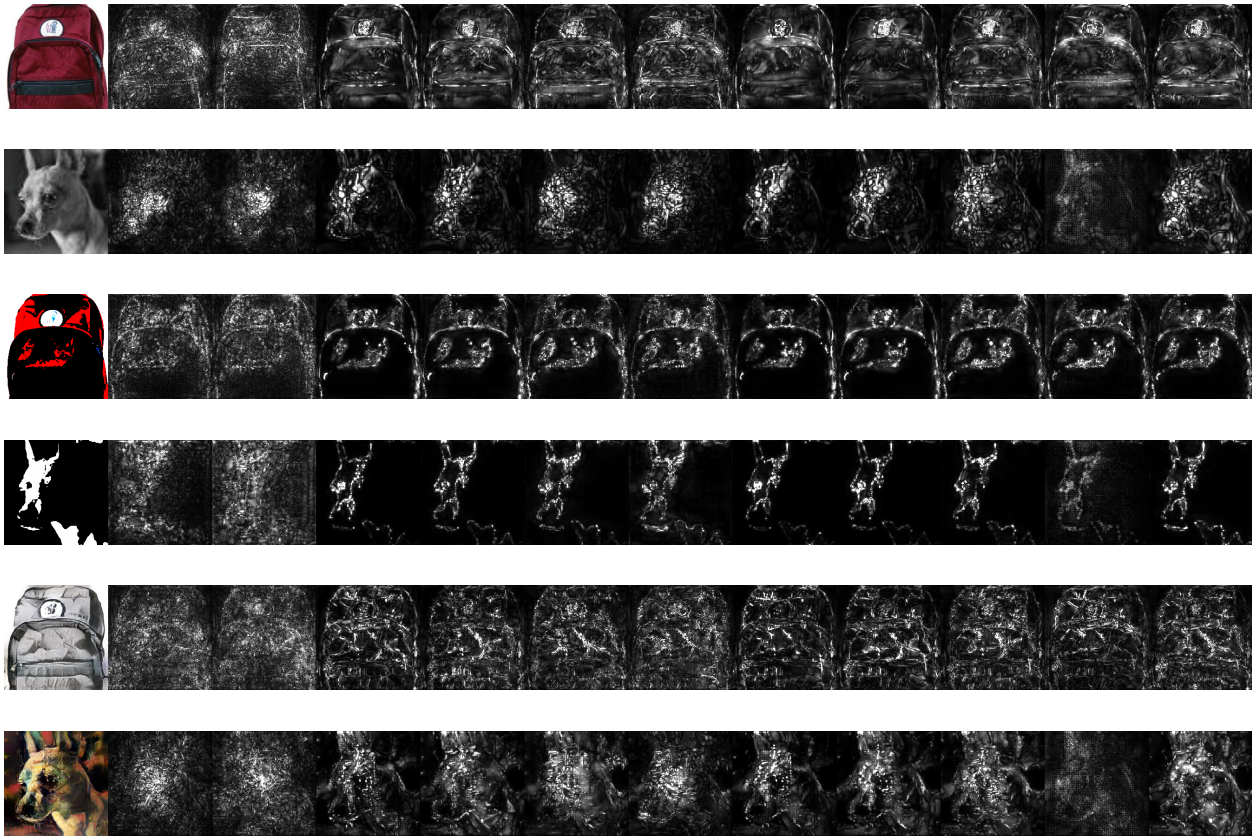

Figure 1. Visualization of Saliency maps generated from **SmoothGrad** (Smilkov et al., 2017) for all 11 models. From left to right, Standard CNNs, underfitting CNNs, PGD-inf: 8, 4, 2, 1, PGD-L2: 12, 8, 4 and FGSM: 8, 4.

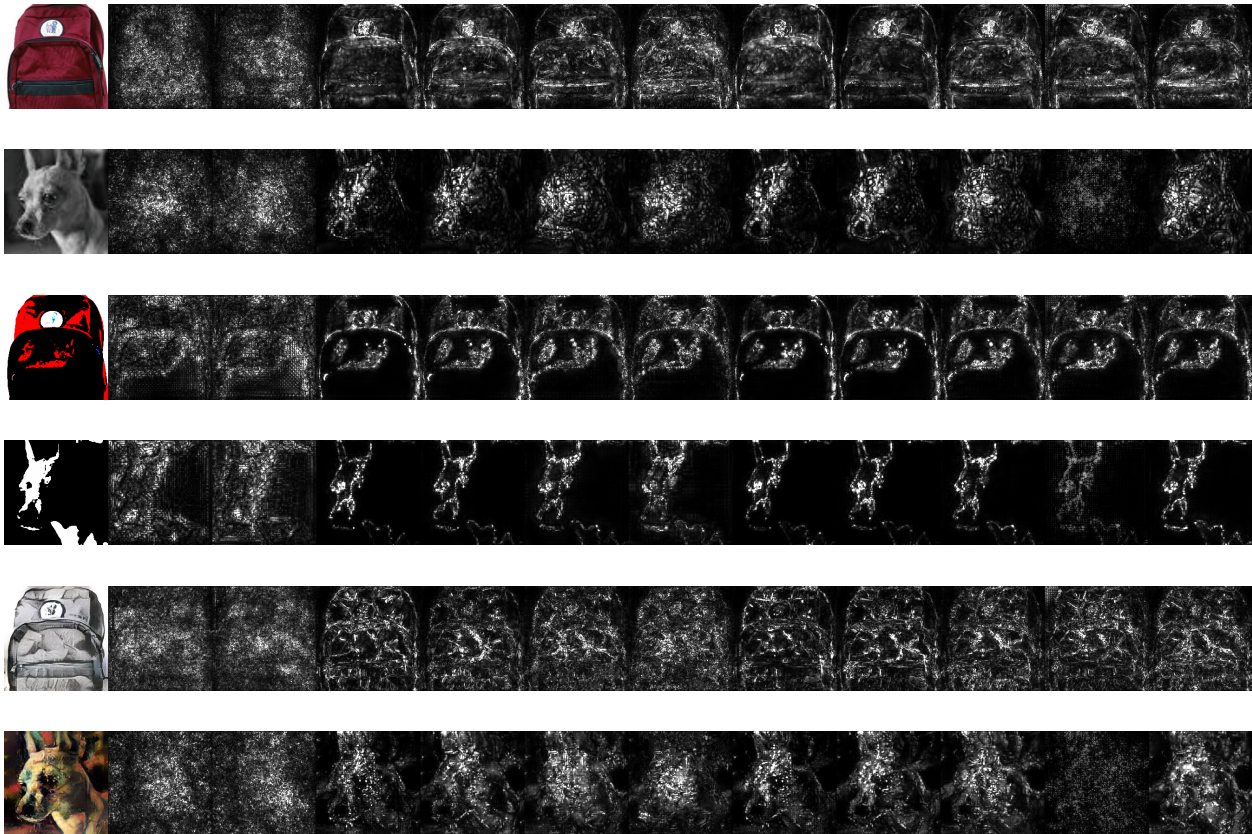

Figure 2. Visualization of Saliency maps generated from **Grad** for all 11 models. From left to right, Standard CNNs, underfitting CNNs, PGD-inf: 8, 4, 2, 1, PGD-L2: 12, 8, 4 and FGSM: 8, 4. It's easily observed that sensitivity maps generated from **Grad** are more noisy compared with its smoothed variant **SmoothGrad**, especially for Standard CNNs and underfitting CNNs.
